# Supplementary material for: Microfluidic device for DNA amplification of single cancer cells isolated from whole blood by self-seeding microwells
Source: Royal Society of Chemistry journal article supplement (doi:10.1039/c5lc00816f), 2015-01-01
Supplement: c5lc00816f1.pdf [file c5lc00816f1.pdf]

**Supplementary Information 1 (S1). Process time of experimental procedure**

| <b>Procedure</b>                  | <b>Time</b>                    | <b>On-chip/ Off-chip procedure</b> |
|-----------------------------------|--------------------------------|------------------------------------|
| Leukocyte depletion procedure     | 50 min                         | Off –chip                          |
| Staining and washing              | 40 min                         |                                    |
| Filtration                        | 10 min                         | On self-seeding microwells         |
| Detection                         | 20 min                         |                                    |
| Punching<br>(Including alignment) | 10 min<br><br>1 sec per 1 cell | On-chip                            |
| Lysis                             | 10 min                         |                                    |
| Neutralization                    | 10 min                         |                                    |
| On-chip amplification             | 16 h                           |                                    |
| Inactivation                      | 10 min                         | Off-chip                           |
| Purification                      | 15 min                         |                                    |
| qPCR                              | 2h 30 min                      |                                    |

## **Supplementary Information 2 (S2) . Detailed protocol for the leukocyte depletion procedure**

RosetteSep CTC Enrichment Cocktail Containing Anti-CD36 (Stemcell technology) was used for the depletion of leukocytes in 1 ml of whole blood. The protocol was performed as described by the manufacturer. In short 50  $\mu$ l of Rossetsep reagent was added to 1 ml of whole blood spiked with 1000 MCF7 cells and incubated for 20 min after mixing. 1 ml of 2% FBS in PBS was added onto the blood to dilute. 4.5 ml of Ficoll paque PLUS (GE healthcare) was prepared in a SepMate tube (Stemcell technology). Then, 2 ml of diluted blood was carefully loaded on the top of Ficoll layer and followed by centrifugation at 1200 X g for 10 min with break-on. After centrifugation, the top layer was poured into a new tube and 4 ml of 2% FBS in PBS solution was added and mixed. Then, the tube was centrifuged at 300 X g for 8 min and the supernatant aspirated. The pellet was resuspended by pipetting in 50  $\mu$ l of 1X PBS including 1 % BSA and the staining reagents.
